# Supplementary material
Source: publisher figshare collection journal article supplement (https://acs.figshare.com/ndownloader/files/14763347)
Supplement: Supplementary file 1 [file 14763347]

## Supporting Information

# **pH-Dependent morphology and photoresponse of azopyridine-terminated Poly(N-isopropylacrylamide) nanoparticles in water**

*Hao Ren,<sup>a</sup> Xing-Ping Qiu,<sup>b</sup> Yan Shi,<sup>c</sup> Peng Yang,<sup>a</sup> Françoise M. Winnik<sup>\*d,e</sup>*

<sup>a</sup> School of Chemistry and Chemical Engineering, Shaanxi Normal University, Xi'an 710062, P. R. China.

<sup>b</sup> Department of Chemistry, University of Montreal, CP 6128 Succursale Centre Ville, Montreal, QC, H3C 3J7, Canada.

<sup>c</sup> School of Materials Science and Engineering, Beijing University of Chemical Technology, Beijing 100029, P. R. China.

<sup>d</sup> Laboratory of Polymer Chemistry, Department of Chemistry, University of Helsinki, P.O. Box 55, Helsinki 00014, Finland

<sup>e</sup> International Center for Materials Nanoarchitectonics, National Institute for Materials Science, 1-1 Namiki, Tsukuba 305-0044, Japan

E-mail: francoise.winnik@helsinki.fi

## Contents

|                                                                |    |
|----------------------------------------------------------------|----|
| 1. Synthesis and characterization of CTA-Azo and CTA-AzPy..... | 3  |
| 2. Characterization of end functional PNIPAMs .....            | 6  |
| 3. Characterization of self-assembly structure .....           | 9  |
| 4. Hydrolysis test.....                                        | 10 |
| 5. UV-responsive properties.....                               | 12 |

# 1. Synthesis and characterization of CTA-Azo and CTA-AzPy

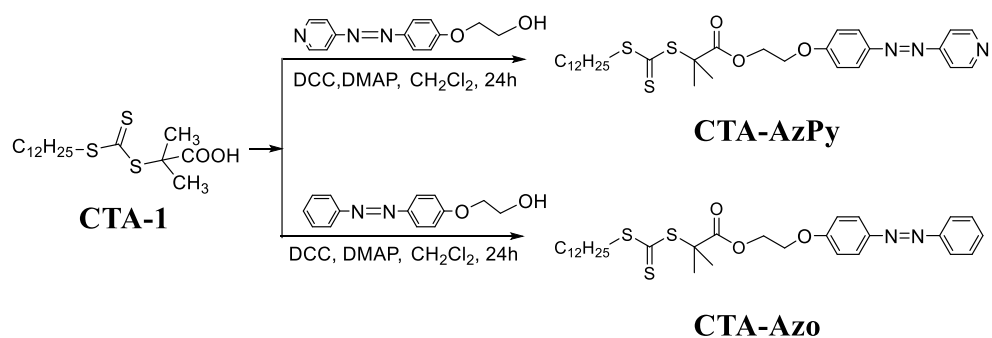

**Scheme S1.** Synthesis route of RAFT agent CTA-Azo and CTA-AzPy.

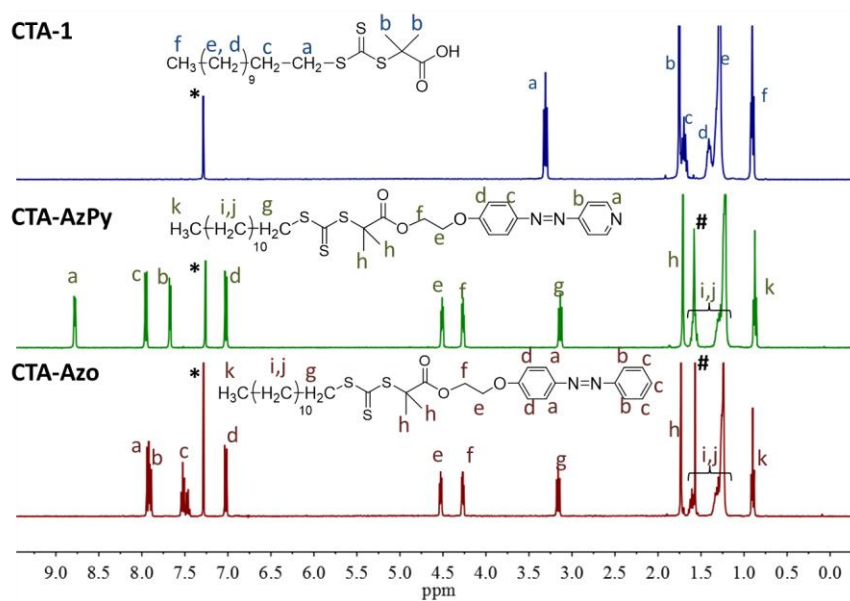

**Figure S1.**  $^1\text{H}$  NMR spectrum of CTA-1, CTA-Azo and CTA-AzPy, solvent  $\text{CDCl}_3$ . (\* solvent peak, #  $\text{H}_2\text{O}$  peak)

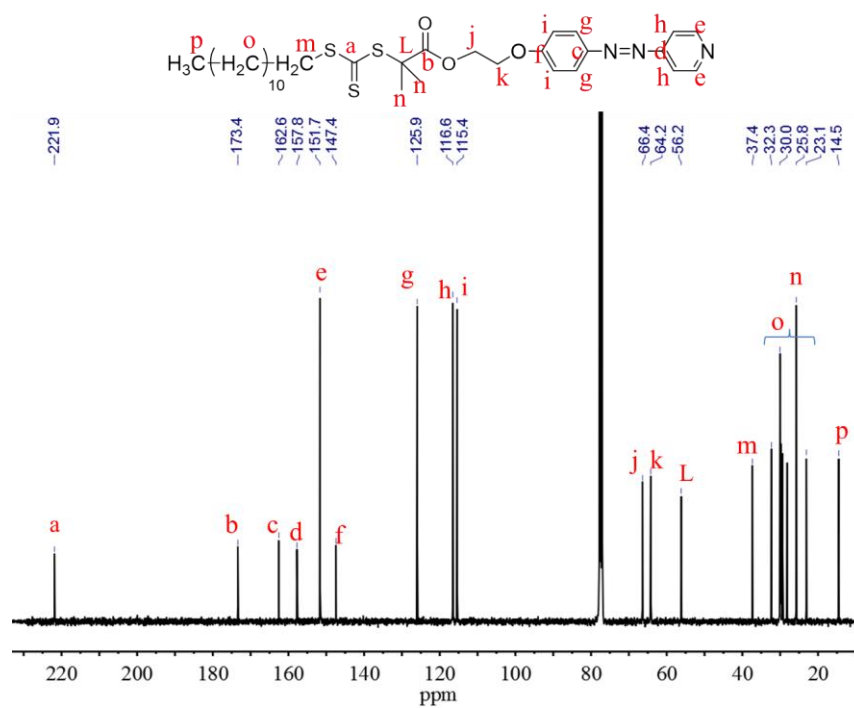

**Figure S2.**  $^{13}\text{C}$  NMR spectrum of CTA-AzPy, solvent  $\text{CDCl}_3$ .

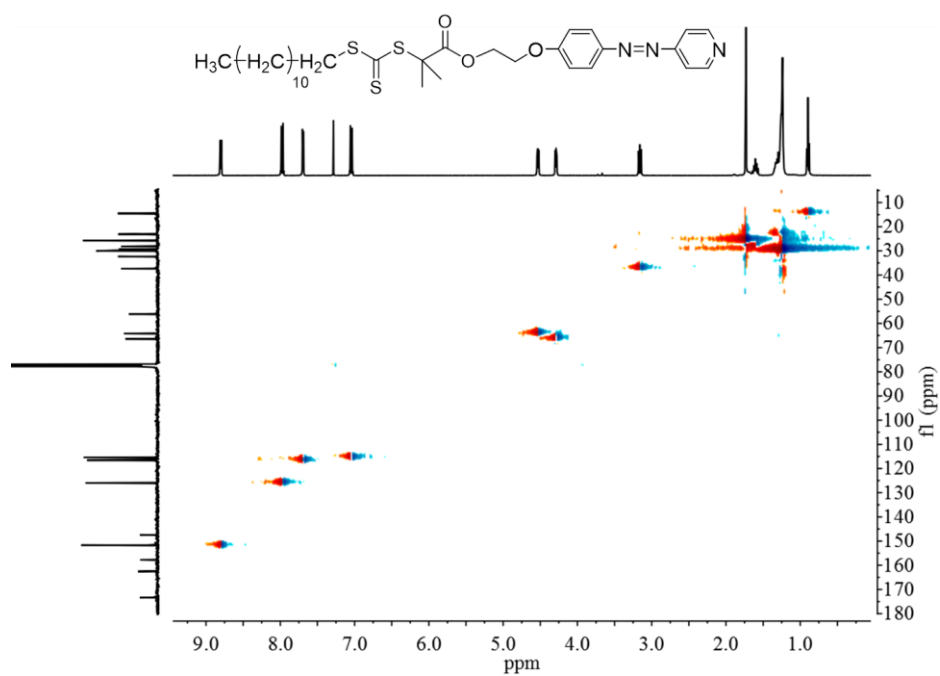

**Figure S3.** 2D-HMOC spectrum of CTA-AzPy, solvent  $\text{CDCl}_3$ .

|                      |                      |                       |                 |
|----------------------|----------------------|-----------------------|-----------------|
| <b>Data File</b>     | CTA7-2.d             | <b>Sample Name</b>    | CTA7-2          |
| <b>Sample Type</b>   | Sample               | <b>Position</b>       | P1-B2           |
| <b>Analysis Date</b> | 3/24/2017 4:48:34 PM | <b>User Name</b>      | Marie-Christine |
| <b>Acq Method</b>    | ESI_POS_DL.m         | <b>InstrumentName</b> | TOF 6224        |
| <b>Comment</b>       |                      |                       |                 |

MS Spectrum

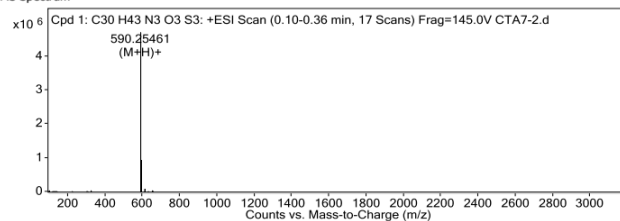

MS Zoomed Spectrum

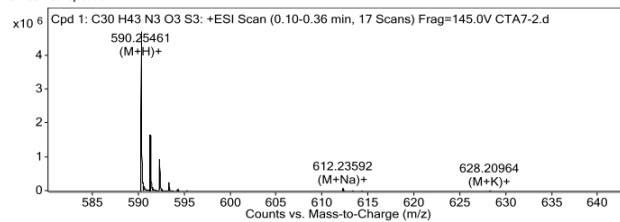

MS Spectrum Peak List

| Ion     | Ion Formula  | Abund      | Expe. m/z | Calc. m/z | Diff(ppm) |
|---------|--------------|------------|-----------|-----------|-----------|
| (M+H)+  | C30H43N3O3S3 | 4696936.73 | 590.25461 | 590.25393 | -1.14     |
| (M+Na)+ | C30H43N3O3S3 | 89783.27   | 612.23592 | 612.23588 | -0.07     |
| (M+K)+  | C30H43N3O3S3 | 29057.59   | 628.20964 | 628.20981 | 0.27      |

Figure S4. MS spectrum of CTA-AzPy

## 2. Characterization of end functional PNIPAMs

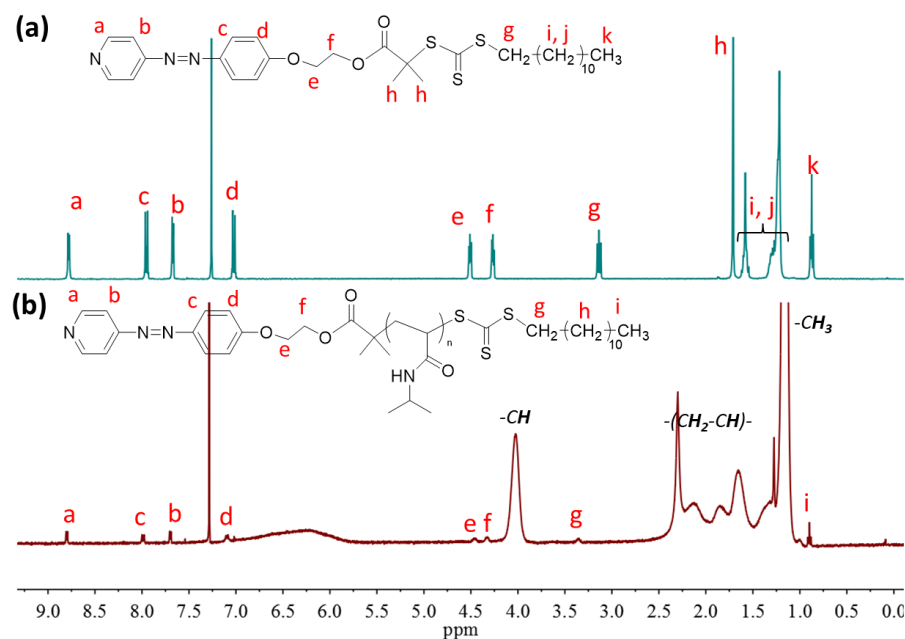

**Figure S5.**  $^1\text{H}$  NMR spectrum and the peak assignment of (a), CTA-AzPy and C12-PN-AzPy 12K. (solvent  $\text{CDCl}_3$ )

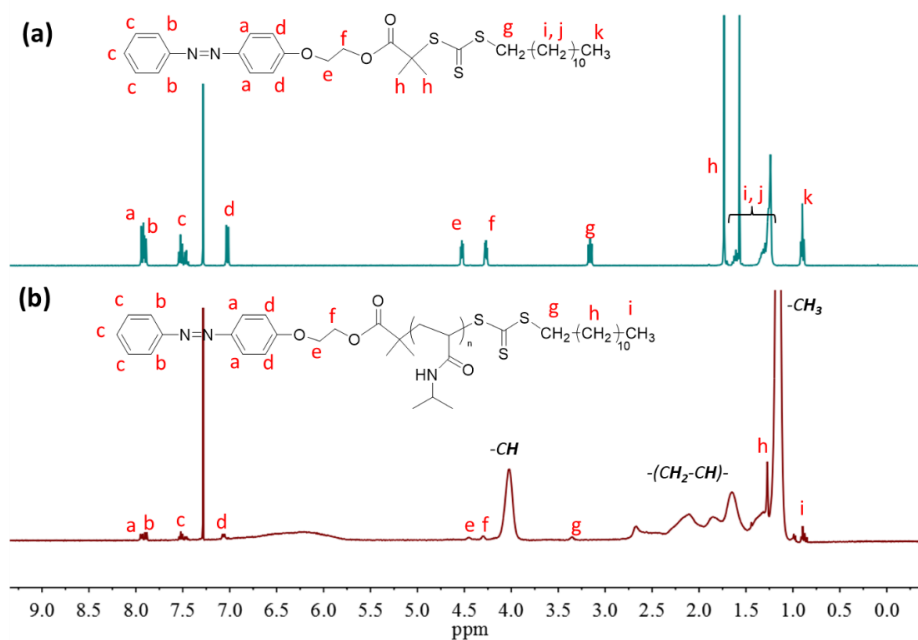

**Figure S6**  $^1\text{H}$  NMR spectrum and the peak assignment of (a), CTA-Azo and (b) C12-PN-Azo (solvent  $\text{CDCl}_3$ )

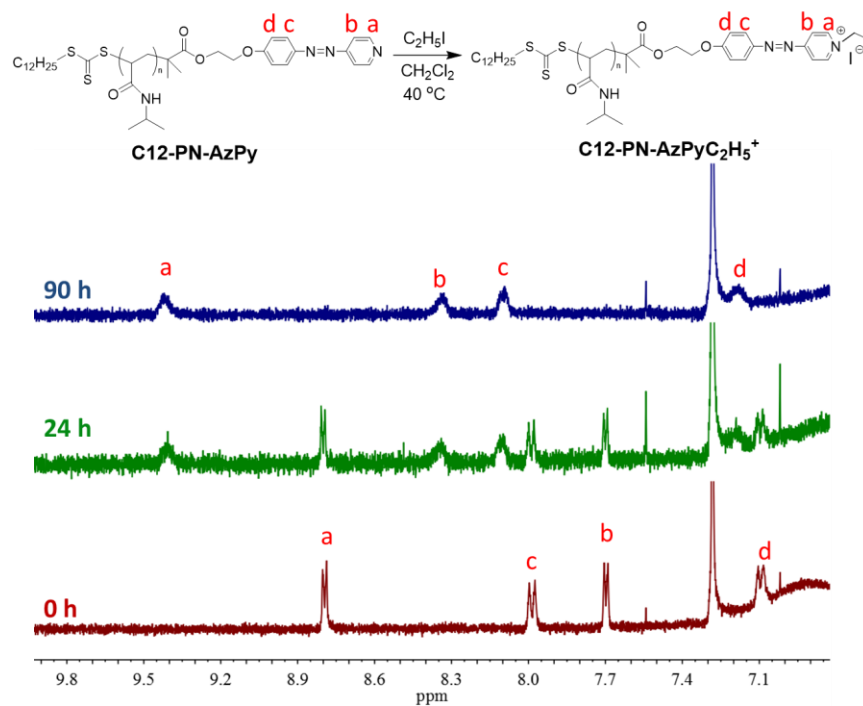

**Figure S7**  $^1\text{H}$  NMR spectrum and the peak assignment of C12-PN-AzPy 12K and C12-PN-AzPy $\text{C}_2\text{H}_5^+$  (solvent  $\text{CDCl}_3$ )

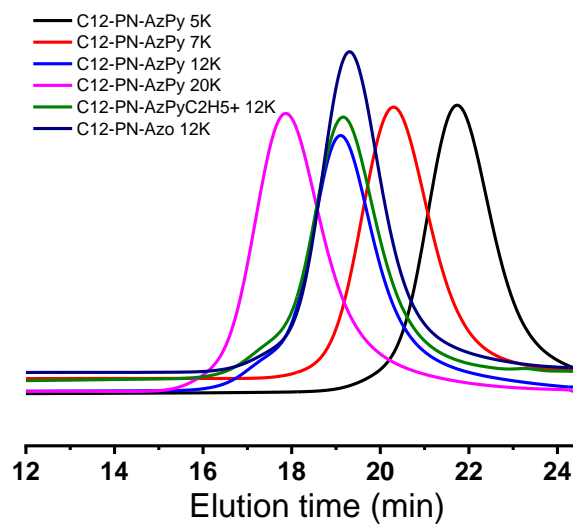

**Figure S8.** GPC analysis of C12-PN-AzPy, C12-PN-AzPy $\text{C}_2\text{H}_5^+$  and C12-PN-Azo. (DMF as eluent)

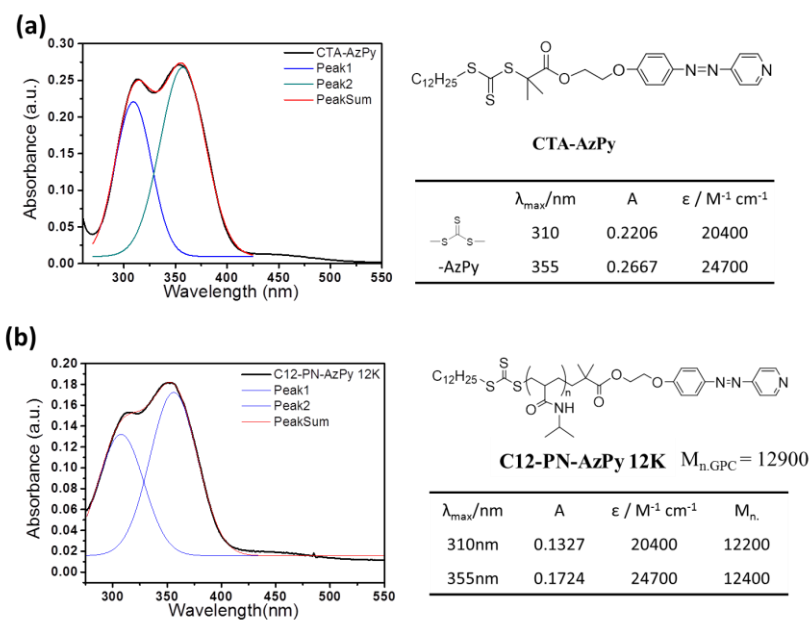

**Figure S9.** (a), UV-vis spectrum of CTA-AzPy and the determination of molar extinction coefficient ( $\epsilon$ ); (b), determination of molecular weight of C12-PN-AzPy 12K by UV-vis spectrum. (peak separation function, Gauss, fitting from 270nm to 450nm )



### 3. Characterization of self-assembly structure

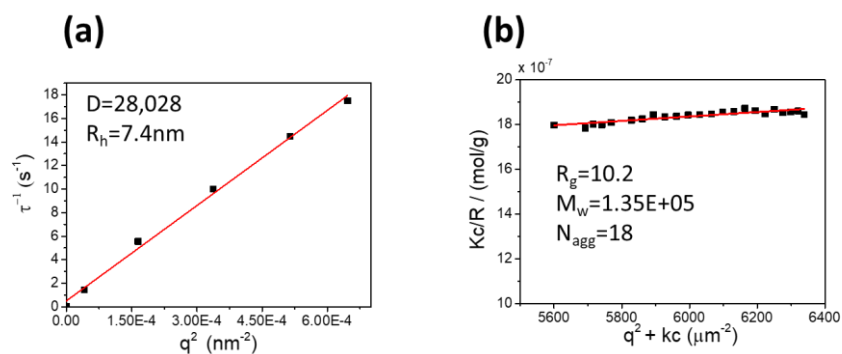

**Figure S10.** (a). Example of DLS plot and (b) Zimm plot of polymer micelles for C12-PN-AzPy 7K at 10 °C (k is constant for 5600 in this case.)

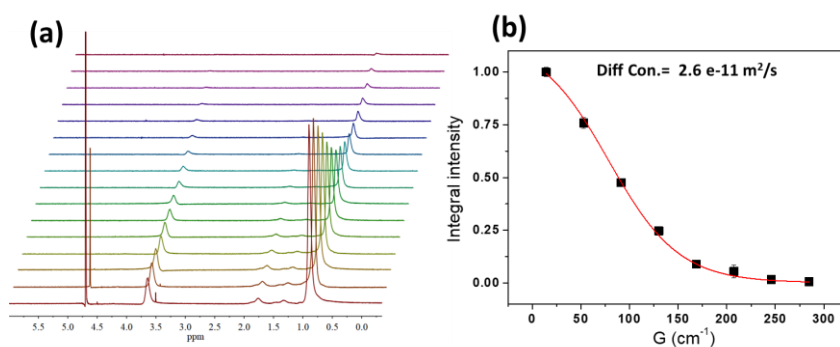

**Figure S11.** Diffusion NMR measurements of C12-PN-AzPy at 10 °C in D<sub>2</sub>O. (a), Diffusion spectrum of C12-PN-AzPy 12K in D<sub>2</sub>O.(b), Fitting curve of the diffusion constant (D) of C12-PN-AzPy 12K.

**Table S1.** Summary of the fitted diffusion constants and corresponding  $R_h$  values.

| Sample name                                                   | $M_n$ (g/mol) | D (m <sup>2</sup> /s) | $R_h$ (nm) |
|---------------------------------------------------------------|---------------|-----------------------|------------|
| C12-PNIPAM-AzPy 5K                                            | 5800          | 3.5e-11               | 5.9        |
| C12-PNIPAM-AzPy 7K                                            | 7800          | 2.6e-11               | 7.9        |
| C12-PNIPAM-AzPy 12K                                           | 12900         | 2.6e-11               | 8.0        |
| C12-PNIPAM-AzPy 20K                                           | 19700         | 1.9e-11               | 10.9       |
| C12-PNIPAM-AzPyC <sub>2</sub> H <sub>5</sub> <sup>+</sup> 12K | 12900         | 2.4e-11               | 8.62       |

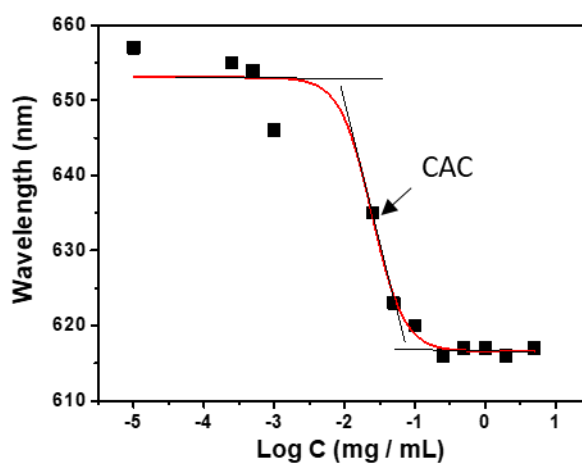

**Figure S12.** The plot of the maximum wavelength of the NR emission versus the C12-PN-AzPy 12K concentration.

#### 4. Hydrolysis test

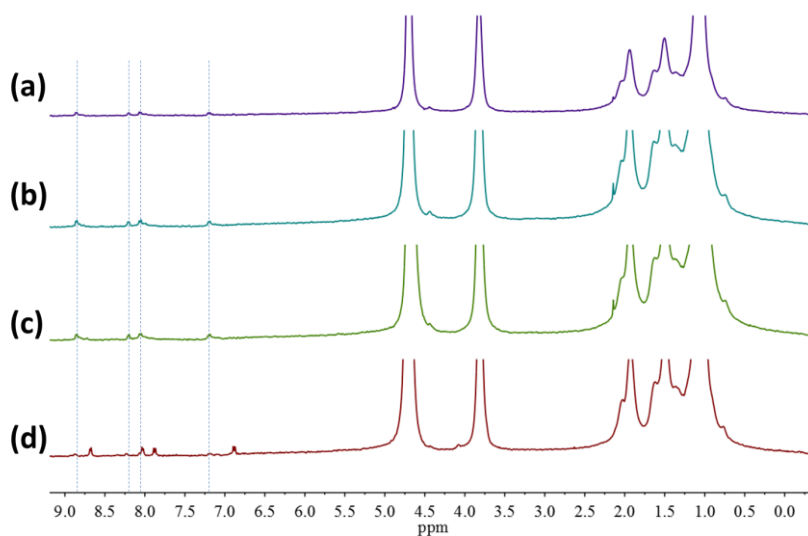

**Figure. S13.** Hydrolysis testing of C12-PN-AzPy 12K under acid condition (a), pH=3 after 25 hours; (b), pH=3 after 5 days; (c) pH=3 after 5 days and 24 hours under 70 °C; (d), pH=1 after 5 days. (Signal of ionized azopyridine at aromatic part shift to high field when hydrolysis occurs)

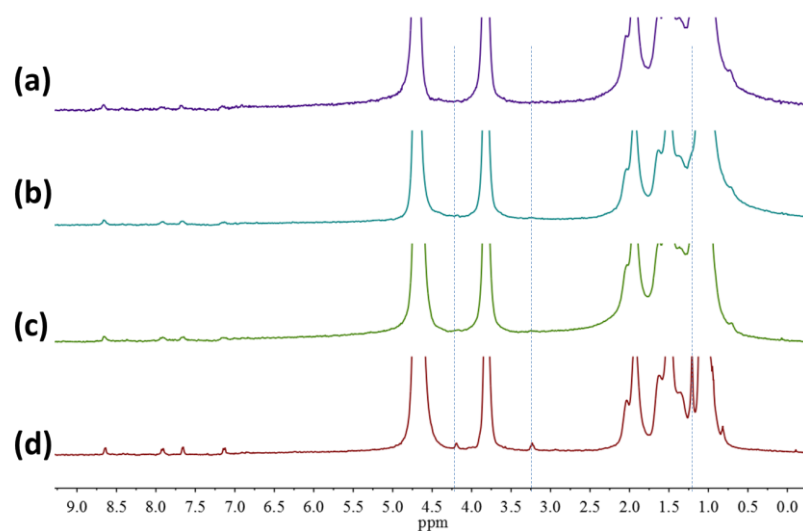

**Figure. S14.** Hydrolysis testing of C12-PN-AzPy 12K under base condition (a), pH=10 after 25 hours; (b), pH=10 after 5 days and 1.5 hours under 70 °C ; (c) pH=10 after 5 days and 24 hours under 70 °C; (d), pH=14 after 5 days 24 hours and under 70 °C. (Signal of azopyridine at aromatic part, CH<sub>2</sub> groups on C12 and HO-C2-AzPy becomes sharper when hydrolysis occurs)

## 5. UV-responsive properties.

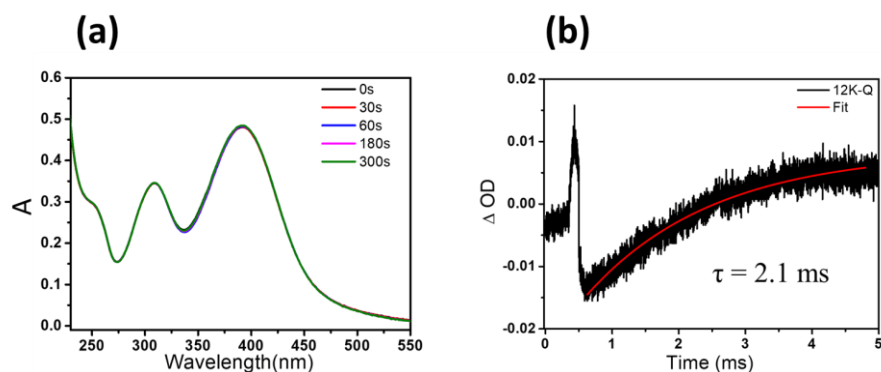

**Figure S15.** (a) UV-Vis spectra under different irradiation time (365 nm) and (b) Transient absorption spectra of C12-PN-AzPyC<sub>2</sub>H<sub>5</sub><sup>+</sup> 12K aqueous solution (0.5 mg/mL).

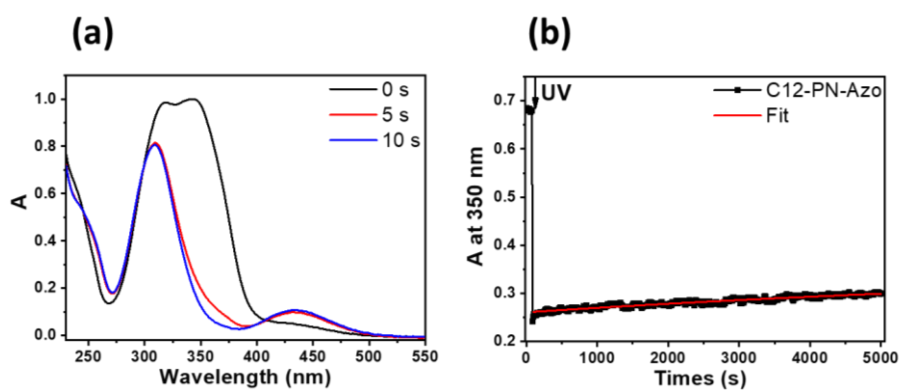

**Figure S16.** (a) UV-Vis spectra under different irradiation time (365 nm) and (b) Transient absorption spectra of C12-PN-Azo 12K aqueous solution (0.5 mg/mL, 10 °C).
